# Supplementary material
Source: Springer Nature journal article supplement (https://www.springermedizin.de/resource/supplementary/12959_2010_140_MOESM6_ESM.pdf/9569698)

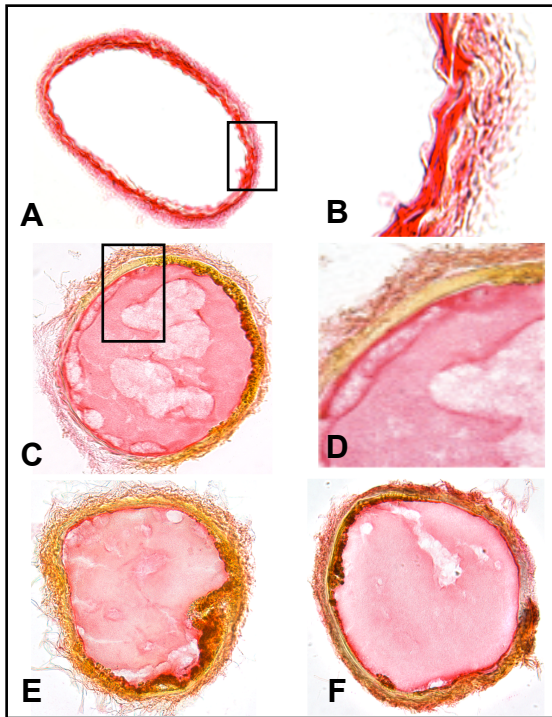

**G**

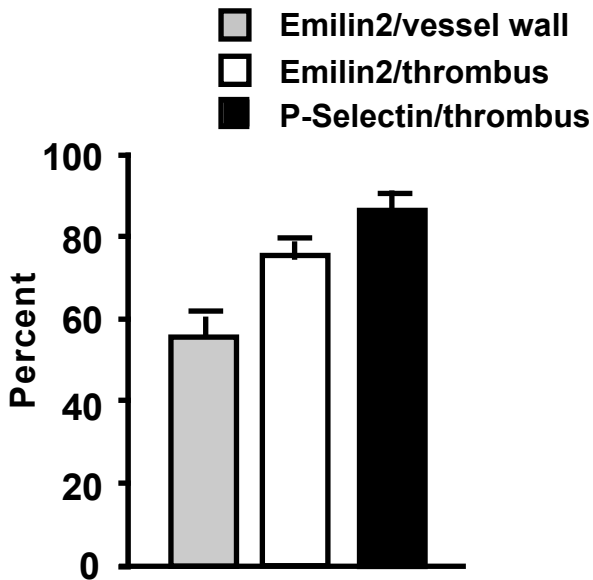

Supplement: MOESM6 [file 9569698]
